# Supplementary material for: Hydrothermal synthesis of a novel nanolayered tin phosphate for removing Cr(iii)
Source: Royal Society of Chemistry journal article supplement (doi:10.1039/d0ra08775k), 2021-01-01
Supplement: d0ra08775k1.pdf [file d0ra08775k1.pdf]

## Hydrothermal synthesis of a novel nanolayered tin phosphate for removing Cr (III)

Wei-Qi Li, Duan Liu and Ji-Yan Qu, Jian-Hong Luo\*

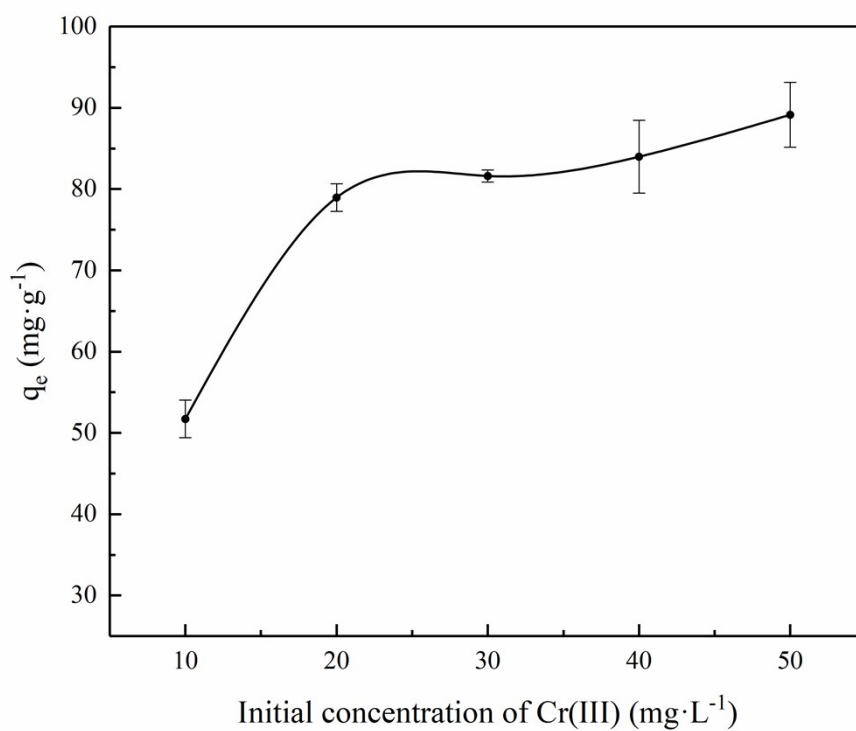

Figure.S1 Effect of initial concentration on the adsorption of Cr (III) onto SnP-H+ at 25.0°C

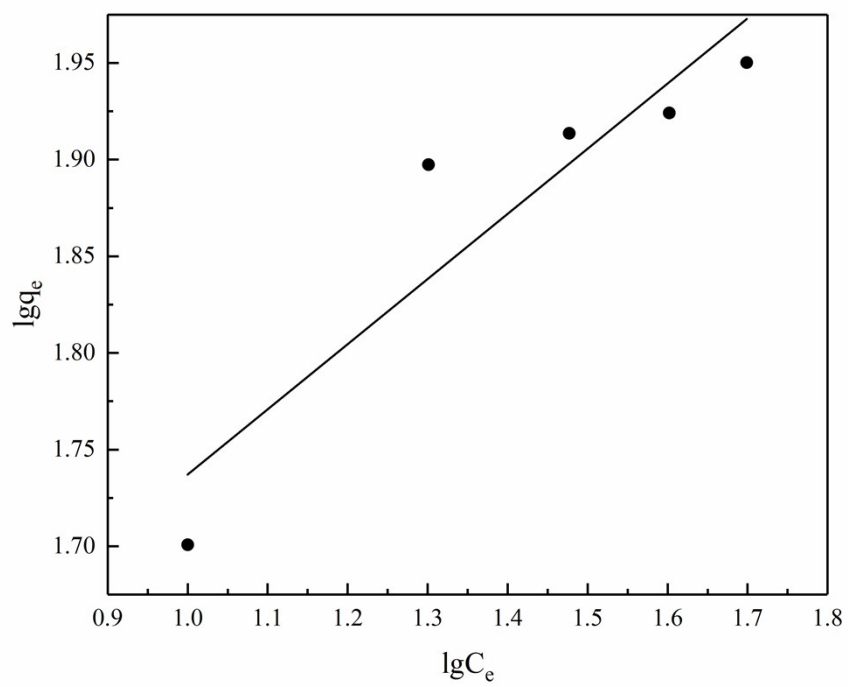

Figure.S2 Isotherm plot for Cr(III) adsorption by SnP-H<sup>+</sup> at the fitting of Freundlich isotherm model (adsorption conditions: temperature=25.0 °C, contact time= 40min).

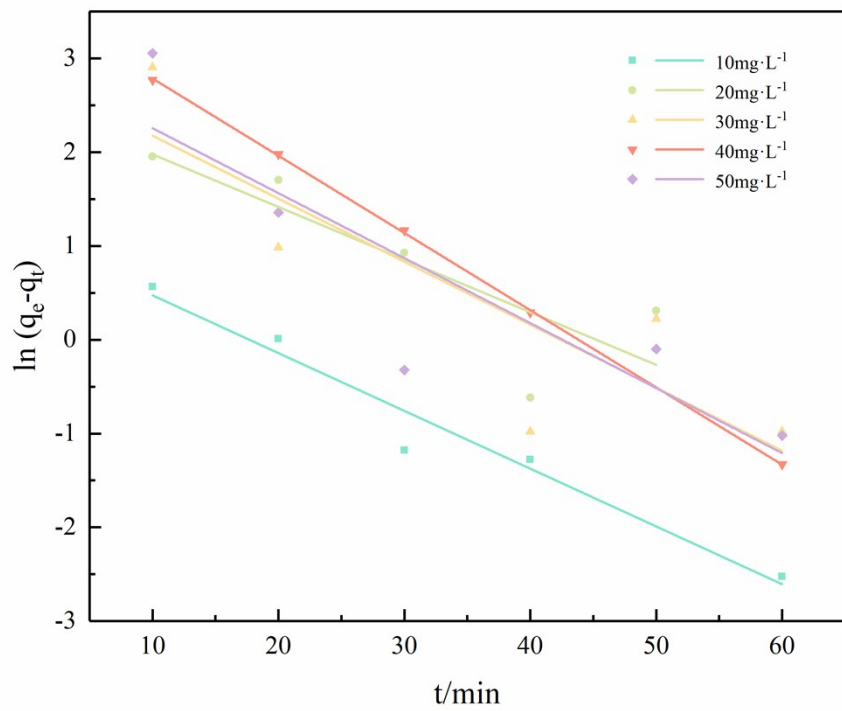

Figure.S3 The fitting plots of the pseudo-first-order kinetic model for Cr(III) adsorption on SnP-H<sup>+</sup>
